# Supplementary material
Source: publisher site journal article supplement (https://www.dovepress.com/article/supplementary_file/578869/578869%20Supplementary%20Material.docx)

**Supporting Information**


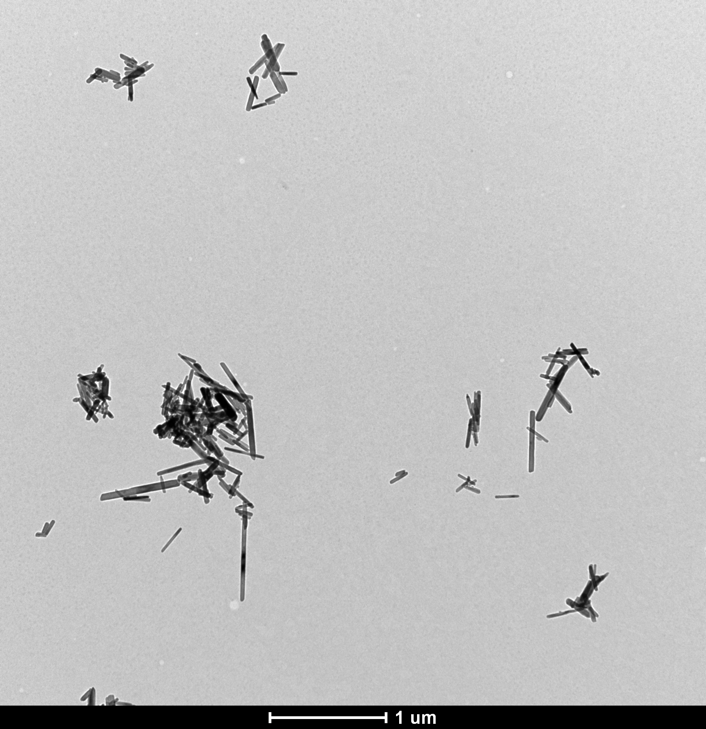


Figure S1. TEM image of Mn-rods.

Supplement: Supplementary file 1 [file 578869%20Supplementary%20Material.docx]
